# Supplementary material
Source: MDPI journal article supplement (https://www.mdpi.com/2076-3417/11/12/5687)
Supplement: s1 [file s1]

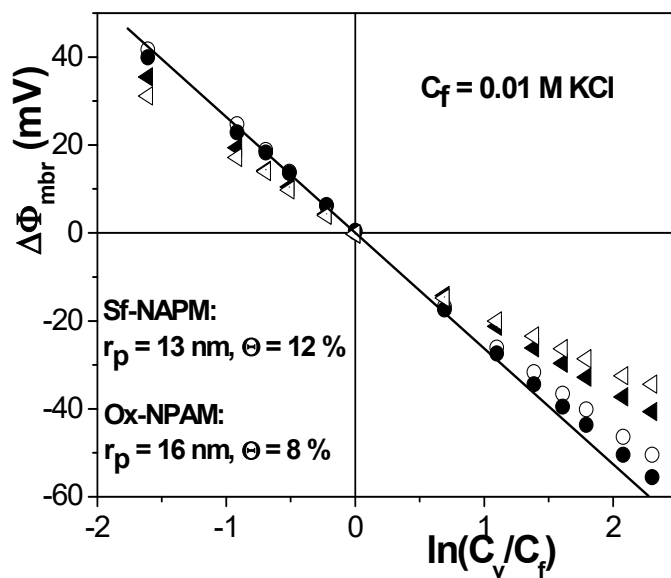

**Figure S3.** Membrane potential vs KCl solutions concentration ratio for samples: Sf-NPAM (o), Ox-NPAM ( $\nabla$ ), Sf-NPAM+TiO<sub>2</sub> (●) and Ox-NPAM+TiO<sub>2</sub> ( $\blacktriangle$ ) membranes, ideal anion-exchange membrane (solid line,  $t_{Cl^-} = 1$ ) (from ref. [36]).
