# Supplementary material
Source: MDPI journal article supplement (https://www.mdpi.com/2076-3417/11/12/5687)
Supplement: s1 [file s1]

**Table S1.** Atomic concentration percentages of the elements found on both surfaces of the studied samples\* (from ref. [36].)

| Sample                   | C (%) | Al (%) | Ti (%) | O (%) | S (%) |
|--------------------------|-------|--------|--------|-------|-------|
| Sf-NPAM/TiO <sub>2</sub> | 19.2  | 0.6    | 23.5   | 53.5  | 2.0   |
| Ox-NPAM/TiO <sub>2</sub> | 24.4  | 1.5    | 21.4   | 52.2  | ---   |

\* other elements with A.C. % < 0.5 are not indicated.
