# Supplementary material
Source: MDPI journal article supplement (https://www.mdpi.com/2076-3417/11/12/5687)

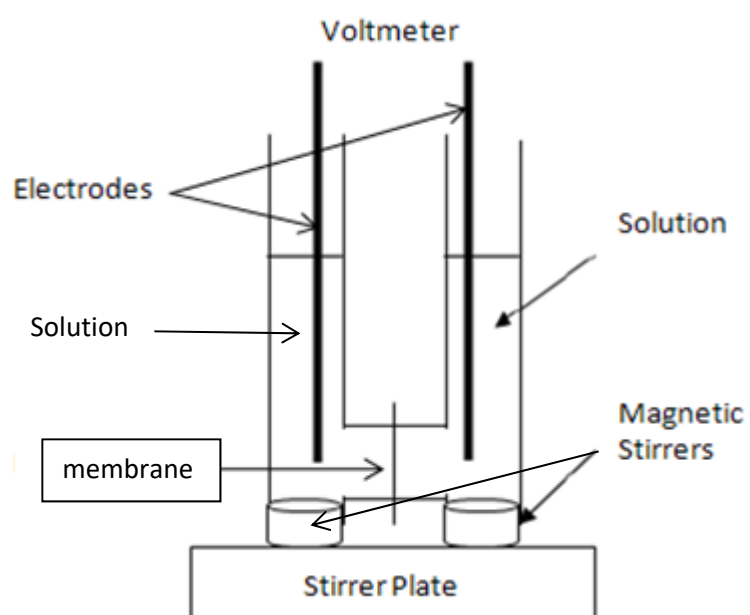

**Figure S2.** Scheme of electrochemical test-cell.

Supplement: s1 [file s1]

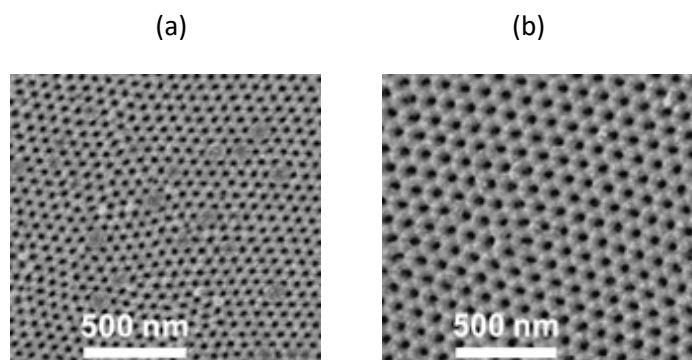

**Figure S1.** SEM micrograph of: (a) Sf-NPAM membrane surface and (b) Ox-NPAM membrane surface (from ref. [36]).

Supplement: s1 [file s1]
